# Supplementary material for: Integrative Multi-Omics Analysis for Etiology Classification and Biomarker Discovery in Stroke: Advancing towards Precision Medicine
Source: MDPI journal article supplement (doi:10.3390/biology13050338), 2024-05-13
Supplement: s1 [file s1]

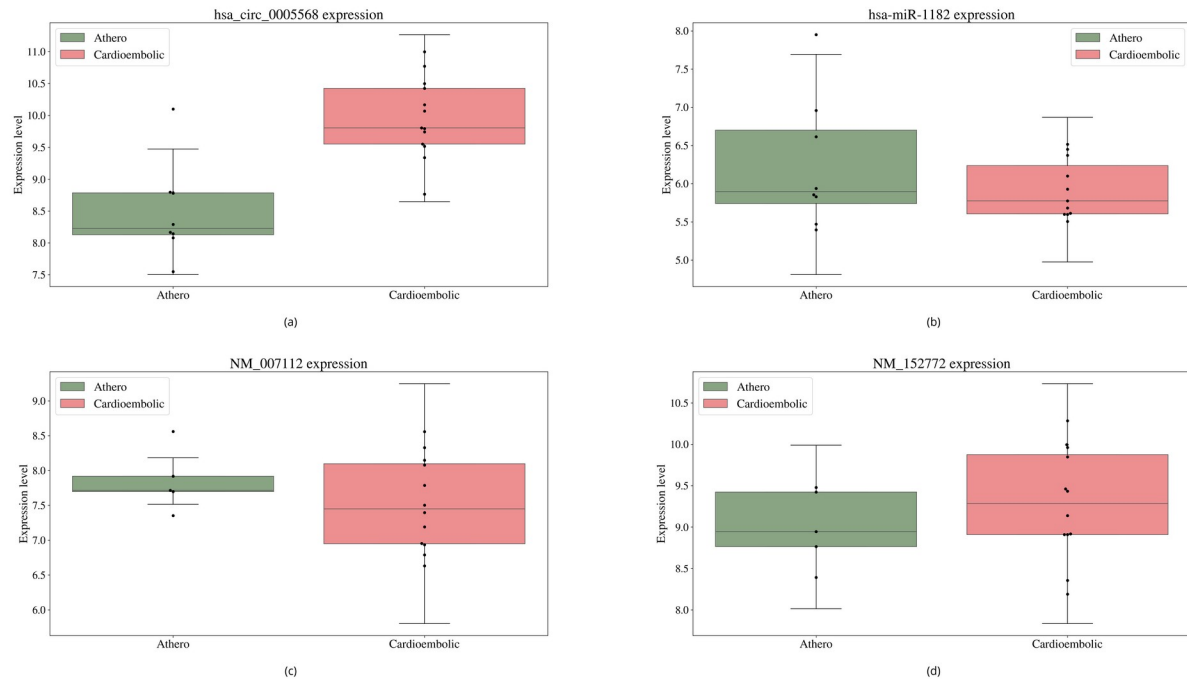

**Supplementary Figure S1.** Expression levels of the features present in the same module than circRNA hsa\_circ\_0005568. Thrombospondin 3 (NM\_007112) is part of the thrombospondin family, which are involved in cell-to-cell and cell-to-matrix communication. They play crucial roles in tissue remodeling and angiogenesis, the development of new blood vessels. These processes are critical in post-stroke recovery and in cardiovascular diseases where tissue repair and angiogenesis are needed. AMIGO2 (NM\_152772) is involved in cell adhesion and signaling. It can influence neuronal maturation and may play roles in neural circuit formation and recovery mechanisms post-stroke.
