# Supplementary material for: Integrative Multi-Omics Analysis for Etiology Classification and Biomarker Discovery in Stroke: Advancing towards Precision Medicine
Source: Biology (Basel). 2024 May 13;13(5):338. doi: 10.3390/biology13050338 (PMC11149453; doi:10.3390/biology13050338)
Supplement: Supplementary file 1 [file biology-13-00338-s001.zip › biomarker_modules.xlsx]

## Sheet: Sheet1
	Regulation	miRNA	circRNA 1	circRNA 2	circRNA 3	circRNA 4	circRNA 5	circRNA 6
0	Up	hsa-miR-182-5p	hsa_circ_0000157	hsa_circ_0022537
1	Up	hsa-miR-877-3p	hsa_circ_0000157	hsa_circ_0001049	hsa_circ_0001549
2	Up	hsa-miR-30d-3p	hsa_circ_0005051	hsa_circ_0047270
3	Up	hsa-miR-338-3p	hsa_circ_0006936	hsa_circ_0000326
4	Up	hsa-miR-26b-3p	hsa_circ_0005397	hsa_circ_0000844
5	Up	hsa-miR-103a-2-5p	hsa_circ_0024604	hsa_circ_0006931	hsa_circ_0047270
6	Up	hsa-miR-412-3p	hsa_circ_0001049	hsa_circ_0000861
7	Up	hsa-miR-361-3p	hsa_circ_0001049	hsa_circ_0001167
8	Up	hsa-miR-942-5p	hsa_circ_0139435	hsa_circ_0011862	hsa_circ_0008868
9	Up	hsa-miR-145-3p	hsa_circ_0001092	hsa_circ_0057748
10	Up	hsa-miR-653-3p	hsa_circ_0001092	hsa_circ_0057748
11	Up	hsa-miR-876-5p	hsa_circ_0001092	hsa_circ_0057748
12	Up	hsa-miR-561-3p	hsa_circ_0001092	hsa_circ_0057748
13	Up	hsa-miR-433-3p	hsa_circ_0001818	hsa_circ_0001535
14	Up	hsa-miR-367-5p	hsa_circ_0001818	hsa_circ_0002113
15	Up	hsa-miR-19b-2-5p	hsa_circ_0000110	hsa_circ_0000844	hsa_circ_0074371	hsa_circ_0002414
16	Up	hsa-miR-670-3p	hsa_circ_0000839	hsa_circ_0119484	hsa_circ_0000861	hsa_circ_0047270
17	Up	hsa-miR-320a	hsa_circ_0000839	hsa_circ_0000326
18	Up	hsa-miR-320b	hsa_circ_0000839	hsa_circ_0000326
19	Up	hsa-miR-1271-3p	hsa_circ_0006931	hsa_circ_0079385
20	Up	hsa-miR-5196-3p	hsa_circ_0119484	hsa_circ_0004901
21	Up	hsa-miR-19b-1-5p	hsa_circ_0000844	hsa_circ_0074371
22	Up	hsa-miR-4778-3p	hsa_circ_0047274	hsa_circ_0005198
23	Up	hsa-miR-490-5p	hsa_circ_0047274	hsa_circ_0047270
24	Up	hsa-miR-6837-3p	hsa_circ_0057748	hsa_circ_0086154
25	Up	hsa-miR-212-5p	hsa_circ_0067127	hsa_circ_0051258
26	Up	hsa-miR-22-3p	hsa_circ_0000861	hsa_circ_0008868
27	Up	hsa-miR-645	hsa_circ_0000606	hsa_circ_0001853
28	Up	hsa-miR-8060	hsa_circ_0122529	hsa_circ_0011862
29	Up	hsa-miR-197-3p	hsa_circ_0001167	hsa_circ_0079385
30	Up	hsa-miR-582-3p	hsa_circ_0001359	hsa_circ_0001402
31	Up	hsa-miR-671-5p	hsa_circ_0001359	hsa_circ_0002113
32	Up	hsa-miR-4459	hsa_circ_0005198	hsa_circ_0060102
33	Up	hsa-miR-651-3p	hsa_circ_0084021	hsa_circ_0005869
34	Up	hsa-miR-22-5p	hsa_circ_0022537	hsa_circ_0009142
35	Down	hsa-miR-198	hsa_circ_0067185	hsa_circ_0007051	hsa_circ_0002198
36	Down	hsa-miR-671-5p	hsa_circ_0067185	hsa_circ_0103520			hsa_circ_0089254
37	Down	hsa-miR-766-3p	hsa_circ_0067185	hsa_circ_0002623	hsa_circ_0007681	hsa_circ_0089252
38	Down	hsa-miR-670-5p	hsa_circ_0067185	hsa_circ_0007248
39	Down	hsa-miR-653-3p	hsa_circ_0005568	hsa_circ_0005957
40	Down	hsa-miR-19b-2-5p	hsa_circ_0005568	hsa_circ_0021506
41	Down	hsa-miR-19b-1-5p	hsa_circ_0005568	hsa_circ_0021506
42	Down	hsa-miR-1324	hsa_circ_0123059
43	Down	hsa-miR-432-3p	hsa_circ_0087192	hsa_circ_0000508	hsa_circ_0091223	hsa_circ_0044170
44	Down	hsa-miR-1273g-3p	hsa_circ_0087192
45	Down	hsa-miR-141-5p	hsa_circ_0009361	hsa_circ_0038249
46	Down	hsa-miR-484	hsa_circ_0009361	hsa_circ_0054598
47	Down	hsa-miR-660-3p	hsa_circ_0009361	hsa_circ_0050867
48	Down	hsa-miR-22-5p	hsa_circ_0009361	hsa_circ_0065173	hsa_circ_0136537
49	Down	hsa-miR-32-3p		hsa_circ_0081888	hsa_circ_0000184
50	Down	hsa-miR-4685-3p		hsa_circ_0074719
51	Down	hsa-miR-583	hsa_circ_0041506	hsa_circ_0002623	hsa_circ_0000184
52	Down	hsa-miR-578	hsa_circ_0041506	hsa_circ_0009172			hsa_circ_0008911
53	Down	hsa-miR-1301-3p	hsa_circ_0041506	hsa_circ_0007704	hsa_circ_0002623	hsa_circ_0001377
54	Down	hsa-miR-1286	hsa_circ_0130400	hsa_circ_0121836
55	Down	hsa-miR-627-3p	hsa_circ_0000122	hsa_circ_0138744	hsa_circ_0065173
56	Down	hsa-miR-510-5p	hsa_circ_0000122	hsa_circ_0009155
57	Down	hsa-miR-552-3p	hsa_circ_0000122	hsa_circ_0005758
58	Down	hsa-miR-503-3p	hsa_circ_0000122	hsa_circ_0001929
59	Down	hsa-miR-185-5p	hsa_circ_0008508	hsa_circ_0075393	hsa_circ_0001828
60	Down	hsa-miR-665	hsa_circ_0008508	hsa_circ_0125793	hsa_circ_0001377	hsa_circ_0023404
61	Down	hsa-miR-29b-1-5p	hsa_circ_0008508	hsa_circ_0038844	hsa_circ_0028173		hsa_circ_0001377	hsa_circ_0012634
62	Down	hsa-miR-508-5p	hsa_circ_0008508	hsa_circ_0125793	hsa_circ_0028173	hsa_circ_0005758
63	Down	hsa-miR-125a-3p	hsa_circ_0052372	hsa_circ_0003362	hsa_circ_0091449	hsa_circ_0001377
64	Down	hsa-miR-548c-3p	hsa_circ_0005927	hsa_circ_0005967
65	Down	hsa-miR-592	hsa_circ_0005927	hsa_circ_0033163
66	Down	hsa-miR-452-3p	hsa_circ_0005927	hsa_circ_0050395
67	Down	hsa-miR-4739	hsa_circ_0001177	hsa_circ_0000480	hsa_circ_0008882	hsa_circ_0131799
68	Down	hsa-miR-3662	hsa_circ_0001177	hsa_circ_0045355
69	Down	hsa-miR-4723-3p	hsa_circ_0087631
70	Down	hsa-miR-7111-3p	hsa_circ_0087631
71	Down	hsa-miR-5197-3p	hsa_circ_0000480	hsa_circ_0005108
72	Down	hsa-miR-548ar-5p	hsa_circ_0000480
73	Down	hsa-miR-4778-3p	hsa_circ_0130311	hsa_circ_0091000	hsa_circ_0075625
74	Down	hsa-miR-6758-5p	hsa_circ_0130311	hsa_circ_0007850
75	Down	hsa-miR-6746-5p	hsa_circ_0028152	hsa_circ_0007482
76	Down	hsa-miR-5699-3p	hsa_circ_0028152
77	Down	hsa-miR-873-5p	hsa_circ_0005108	hsa_circ_0003478	hsa_circ_0045932
78	Down	hsa-miR-761	hsa_circ_0013480	hsa_circ_0003266	hsa_circ_0035907	hsa_circ_0045881
79	Down	hsa-miR-4677-5p	hsa_circ_0004121	hsa_circ_0002453	hsa_circ_0007221
80	Down	hsa-miR-4420	hsa_circ_0065793	hsa_circ_0009435
81	Down	hsa-miR-1236-3p	hsa_circ_0065793	hsa_circ_0000593
82	Down	hsa-miR-642a-5p	hsa_circ_0065793	hsa_circ_0003478	hsa_circ_0009172
83	Down	hsa-miR-33a-3p	hsa_circ_0007928	hsa_circ_0007646	hsa_circ_0068772
84	Down	hsa-miR-520a-5p	hsa_circ_0007928	hsa_circ_0007646	hsa_circ_0000184
85	Down	hsa-miR-617	hsa_circ_0007928	hsa_circ_0007646
86	Down	hsa-miR-15b-3p	hsa_circ_0007928	hsa_circ_0069718	hsa_circ_0007646	hsa_circ_0001730
87	Down	hsa-miR-890	hsa_circ_0007928	hsa_circ_0007646
88	Down	hsa-miR-29a-5p	hsa_circ_0138744	hsa_circ_0092293	hsa_circ_0091074
89	Down	hsa-miR-3692-5p	hsa_circ_0082319	hsa_circ_0121836
90	Down	hsa-miR-939-5p	hsa_circ_0082319	hsa_circ_0045308
91	Down	hsa-miR-519e-5p	hsa_circ_0054033	hsa_circ_0003478
92	Down	hsa-miR-103a-2-5p	hsa_circ_0038249	hsa_circ_0091000	hsa_circ_0007221
93	Down	hsa-miR-34b-5p	hsa_circ_0038249	hsa_circ_0119785	hsa_circ_0050395	hsa_circ_0090650
94	Down	hsa-miR-323a-5p	hsa_circ_0046435	hsa_circ_0002198
95	Down	hsa-miR-608	hsa_circ_0046435	hsa_circ_0003266	hsa_circ_0003362	hsa_circ_0007482
96	Down	hsa-miR-449b-5p	hsa_circ_0046435	hsa_circ_0040994	hsa_circ_0090650
97	Down	hsa-miR-449a	hsa_circ_0046435	hsa_circ_0040994
98	Down	hsa-miR-328-5p	hsa_circ_0046435	hsa_circ_0002515
99	Down	hsa-miR-449c-5p	hsa_circ_0119785	hsa_circ_0009435	hsa_circ_0090650
100	Down	hsa-miR-450b-5p	hsa_circ_0119785	hsa_circ_0091449	hsa_circ_0001730
101	Down	hsa-miR-1184	hsa_circ_0001876	hsa_circ_0036766
102	Down	hsa-miR-329-5p	hsa_circ_0001876	hsa_circ_0075625	hsa_circ_0128200	hsa_circ_0006033
103	Down	hsa-miR-6856-5p	hsa_circ_0001876	hsa_circ_0007850	hsa_circ_0007051
104	Down	hsa-miR-4763-3p	hsa_circ_0005272	hsa_circ_0003524
105	Down	hsa-miR-661	hsa_circ_0038844	hsa_circ_0066113	hsa_circ_0002198
106	Down	hsa-miR-29b-2-5p	hsa_circ_0038844	hsa_circ_0004673
107	Down	hsa-miR-135a-5p	hsa_circ_0038844	hsa_circ_0091223
108	Down	hsa-miR-135b-5p	hsa_circ_0038844	hsa_circ_0091223
109	Down	hsa-miR-640	hsa_circ_0005279	hsa_circ_0028173
110	Down	hsa-miR-4692	hsa_circ_0005279	hsa_circ_0038632
111	Down	hsa-miR-4514	hsa_circ_0005279	hsa_circ_0038632
112	Down	hsa-miR-26b-3p	hsa_circ_0005279	hsa_circ_0076798
113	Down	hsa-miR-544a	hsa_circ_0065173	hsa_circ_0007704	hsa_circ_0045932
114	Down	hsa-miR-130b-5p	hsa_circ_0065173	hsa_circ_0000593
115	Down	hsa-miR-335-3p	hsa_circ_0065173	hsa_circ_0101212	hsa_circ_0003300
116	Down	hsa-miR-193a-5p	hsa_circ_0040507	hsa_circ_0001730
117	Down	hsa-miR-639	hsa_circ_0040507	hsa_circ_0007482
118	Down	hsa-miR-587	hsa_circ_0081888	hsa_circ_0075393	hsa_circ_0045881
119	Down	hsa-miR-3976	hsa_circ_0007850
120	Down	hsa-miR-217	hsa_circ_0009435	hsa_circ_0007704	hsa_circ_0023404
121	Down	hsa-miR-518c-5p	hsa_circ_0075393	hsa_circ_0003478
122	Down	hsa-miR-548e-5p	hsa_circ_0099226
123	Down	hsa-miR-182-5p	hsa_circ_0077216	hsa_circ_0005402	hsa_circ_0035560	hsa_circ_0002515
124	Down	hsa-miR-146b-5p	hsa_circ_0077216	hsa_circ_0092293
125	Down	hsa-miR-208a-5p	hsa_circ_0005402	hsa_circ_0002453	hsa_circ_0091074
126	Down	hsa-miR-9-5p	hsa_circ_0005402	hsa_circ_0089252	hsa_circ_0035560
127	Down	hsa-miR-33b-5p	hsa_circ_0005402	hsa_circ_0035560
128	Down	hsa-miR-377-3p	hsa_circ_0000508
129	Down	hsa-miR-5095
130	Down	hsa-miR-96-3p	hsa_circ_0125793	hsa_circ_0057582
131	Down	hsa-miR-4490	hsa_circ_0000432	hsa_circ_0005361
132	Down	hsa-miR-452-5p	hsa_circ_0000432	hsa_circ_0005758
133	Down	hsa-miR-34c-5p	hsa_circ_0007704	hsa_circ_0040994	hsa_circ_0090650
134	Down	hsa-miR-330-5p	hsa_circ_0064644	hsa_circ_0076798	hsa_circ_0003552
135	Down	hsa-miR-15a-5p	hsa_circ_0064644	hsa_circ_0067159
136	Down	hsa-miR-424-5p	hsa_circ_0064644	hsa_circ_0017412	hsa_circ_0046419
137	Down	hsa-miR-1304-3p	hsa_circ_0066113
138	Down	hsa-miR-4695-5p	hsa_circ_0066113	hsa_circ_0091722
139	Down	hsa-miR-6739-3p	hsa_circ_0066113	hsa_circ_0003300
140	Down	hsa-miR-136-5p	hsa_circ_0136537	hsa_circ_0023404
141	Down	hsa-miR-503-5p	hsa_circ_0003266	hsa_circ_0076798
142	Down	hsa-miR-1909-3p	hsa_circ_0044097	hsa_circ_0091722
143	Down	hsa-miR-6735-5p	hsa_circ_0044097	hsa_circ_0020962
144	Down	hsa-miR-939-3p	hsa_circ_0044097	hsa_circ_0103520
145	Down	hsa-miR-6881-3p	hsa_circ_0000593	hsa_circ_0074719
146	Down	hsa-miR-7152-5p	hsa_circ_0000593	hsa_circ_0007051
147	Down	hsa-miR-891a-3p	hsa_circ_0003362	hsa_circ_0005758
148	Down	hsa-miR-20b-3p	hsa_circ_0003362	hsa_circ_0067159	hsa_circ_0005957
149	Down	hsa-miR-138-5p	hsa_circ_0005361	hsa_circ_0009172
150	Down	hsa-miR-6855-5p		hsa_circ_0036766
151	Down	hsa-miR-30b-3p	hsa_circ_0002623	hsa_circ_0050395	hsa_circ_0045881
152	Down	hsa-miR-558	hsa_circ_0050395	hsa_circ_0003524	hsa_circ_0001320
153	Down	hsa-miR-601	hsa_circ_0007167	hsa_circ_0077248
154	Down	hsa-miR-153-3p		hsa_circ_0003524
155	Down	hsa-miR-4717-5p		hsa_circ_0121836
156	Down	hsa-miR-34a-5p	hsa_circ_0040994	hsa_circ_0090650
157	Down	hsa-miR-423-5p	hsa_circ_0017412	hsa_circ_0001828
158	Down	hsa-miR-15b-5p	hsa_circ_0017412	hsa_circ_0077248	hsa_circ_0067159
159	Down	hsa-miR-125a-5p	hsa_circ_0047997	hsa_circ_0006033
160	Down	hsa-miR-125b-5p	hsa_circ_0047997	hsa_circ_0006033
161	Down	hsa-miR-497-5p	hsa_circ_0047997	hsa_circ_0077248	hsa_circ_0067159
162	Down	hsa-miR-889-5p	hsa_circ_0077248	hsa_circ_0024446
163	Down	hsa-miR-5003-3p	hsa_circ_0007051	hsa_circ_0067700
164	Down	hsa-miR-580-3p	hsa_circ_0092293	hsa_circ_0001730
165	Down	hsa-miR-152-5p	hsa_circ_0057582	hsa_circ_0045932
166	Down	hsa-miR-103a-3p	hsa_circ_0057582	hsa_circ_0044170
167	Down	hsa-miR-3614-3p		hsa_circ_0007221
168	Down	hsa-miR-3131		hsa_circ_0081199
169	Down	hsa-miR-6736-3p		hsa_circ_0044170
170	Down	hsa-miR-4268		hsa_circ_0091722
171	Down	hsa-miR-367-5p	hsa_circ_0089252	hsa_circ_0089254
172	Down	hsa-miR-770-5p	hsa_circ_0089252	hsa_circ_0089254
173	Down	hsa-miR-504-5p	hsa_circ_0089252	hsa_circ_0089254
174	Down	hsa-miR-214-3p	hsa_circ_0045881	hsa_circ_0053063
175	Down	hsa-miR-374a-3p	hsa_circ_0003898	hsa_circ_0091449
176	Down	hsa-miR-506-5p	hsa_circ_0045932	hsa_circ_0021506
177	Down	hsa-miR-6726-5p	hsa_circ_0024446	hsa_circ_0036766
178	Down	hsa-miR-580-5p	hsa_circ_0001625	hsa_circ_0006033
179	Down	hsa-miR-519d-5p	hsa_circ_0012634	hsa_circ_0003552
180	Down	hsa-miR-526b-3p	hsa_circ_0001455	hsa_circ_0005967
181	Down	hsa-miR-365a-3p	hsa_circ_0007248	hsa_circ_0005967
182	Down	hsa-miR-612	hsa_circ_0009155	hsa_circ_0008911
183	Down	hsa-miR-146a-3p	hsa_circ_0008911	hsa_circ_0001929
184	Down	hsa-miR-370-3p	hsa_circ_0024866	hsa_circ_0001320	hsa_circ_0121836
185	Down	hsa-miR-93-3p	hsa_circ_0001320	hsa_circ_0001929
